# Supplementary material for: Diagnostic Performance of Six Rapid Antigen Tests for SARS-CoV-2
Source: PubMed Central journal article supplement (PMC9045193; doi:10.1128/spectrum.02351-21), 2022-03-16
Supplement: spectrum02351-21_suppmental_file.pdf [file spectrum02351-21_suppmental_file.pdf]

|                    |                |            | Healgen |            | VirCell |            | Siemens |            | Roche   |            | Abbot   |            | MonLab  |            |
|--------------------|----------------|------------|---------|------------|---------|------------|---------|------------|---------|------------|---------|------------|---------|------------|
| Disease Prevalence | Statistic      |            | Value   | 95% CI     | Value   | 95% CI     | Value   | 95% CI     | Value   | 95% CI     | Value   | 95% CI     | Value   | 95% CI     |
| 1%                 | Positive Value | Predictive | 100.0%  |            | 100.0%  |            | 100.0%  |            | 100.0%  |            | 100.0%  |            | 100.0%  |            |
|                    | Negative Value | Predictive | 99.7%   | 99.5-99.7  | 99.8%   | 99.7-99.8  | 99.8%   | 99.7-99.9  | 99.7%   | 99.6-99.8  | 99.7%   | 99.6-99.8  | 99.6%   | 99.5-99.7  |
|                    | Accuracy       |            | 99.7%   | 96.5-100.0 | 99.8%   | 96.8-100.0 | 99.8%   | 96.6-100.0 | 99.7%   | 96.6-100.0 | 99.7%   | 96.1-100.0 | 99.6%   | 96.5-100.0 |
| 5%                 | Positive Value | Predictive | 100.0%  |            | 100.0%  |            | 100.0%  |            | 100.0%  |            | 100.0%  |            | 100.0%  |            |
|                    | Negative Value | Predictive | 98.3%   | 97.6-98.7  | 98.8%   | 98.2-99.2  | 98.9%   | 98.3-99.3  | 98.6%   | 98.0-99.1  | 98.6%   | 98.0-99.0  | 98.2%   | 97.5-98.6  |
|                    | Accuracy       |            | 98.3%   | 94.3-99.8  | 98.9%   | 95.2-99.9  | 99.0%   | 95.2-99.9  | 98.7%   | 94.8-99.9  | 98.7%   | 94.9-99.9  | 98.2%   | 94.2-99.7  |
| 10%                | Positive Value | Predictive | 100.0%  |            | 100.0%  |            | 100.0%  |            | 100.0%  |            | 100.0%  |            | 100.0%  |            |
|                    | Negative Value | Predictive | 96.4%   | 95.2-97.4  | 97.5%   | 96.3-98.3  | 97.8%   | 96.5-98.6  | 97.2%   | 95.9-98.0  | 97.1%   | 95.9-98.0  | 96.2%   | 95.0-97.2  |
|                    | Accuracy       |            | 96.7%   | 91.9-99.0  | 97.7%   | 93.4-99.5  | 97.9%   | 93.6-99.6  | 97.4%   | 92.8-99.4  | 97.3%   | 92.9-99.4  | 96.5%   | 91.6-98.9  |
| 15%                | Positive Value | Predictive | 100.0%  |            | 100.0%  |            | 100.0%  |            | 100.0%  |            | 100.0%  |            | 100.0%  |            |
|                    | Negative Value | Predictive | 94.4%   | 92.5-95.9  | 96.1%   | 94.3-97.4  | 96.5%   | 94.6-97.7  | 95.6%   | 93.7-96.9  | 95.5%   | 93.7-96.8  | 94.1%   | 92.2-95.6  |
|                    | Accuracy       |            | 95.00%  | 89.7-98.1  | 96.58%  | 91.8-99.0  | 96.92%  | 92.1-99.2  | 96.05%  | 91.0-98.7  | 96.01%  | 91.0-98.7  | 94.68%  | 89.3-97.9  |
| 20%                | Positive Value | Predictive | 100.00% |            | 100.00% |            | 100.00% |            | 100.00% |            | 100.00% |            | 100.00% |            |
|                    | Negative Value | Predictive | 92.31%  | 89.8-94.3  | 94.61%  | 92.1-96.3  | 95.11%  | 92.5-96.8  | 93.83%  | 91.2-95.9  | 93.77%  | 91.2-95.6  | 91.86%  | 89.3-93.8  |
|                    | Accuracy       |            | 93.33%  | 87.5-97.0  | 95.44%  | 90.3-98.3  | 95.89%  | 90.7-98.6  | 94.74%  | 89.3-97.9  | 94.68%  | 89.3-97.9  | 92.91%  | 87.0-96.7  |

**Supplementary table 1:** Simulation of the overall  $VPP$ ,  $VPN$ , an accuracy of every test according to prevalence of the 1, 5, 10, 15 and 20%.
